# Supplementary material for: Clot-Based Radiomics Predict a Mechanical Thrombectomy Strategy for Successful Recanalization in Acute Ischemic Stroke
Source: PubMed Central journal article supplement — Stroke. 2020 Jul 20;51(8):2488–94. doi: 10.1161/STROKEAHA.120.030334 (PMC7382538; doi:10.1161/strokeaha.120.030334), 2020-07-20
Supplement: str-51-2488-s001.pdf [file str-51-2488-s001.pdf]

## **Supplemental Material**

### **Clot-Based Radiomics Predict a Mechanical Thrombectomy Strategy for Successful Recanalization in Acute Ischemic Stroke**

Jeremy Hofmeister, Gianmarco Bernava, Andrea Rosi, Maria Isabel Vargas, Emmanuel Carrera, Xavier Montet, Simon Burgermeister, Pierre-Alexandre Poletti, Alexandra Platon, Karl-Olof Lovblad, Paolo Machi

---

**Supplementary Table I:**  
The Radiomics Quality Score (RQS)

**Supplementary Table II:**  
TRIPOD Checklist: Prediction Model Development and Validation

**Supplementary Table I:  
The Radiomics Quality Score (RQS)**

|    | <b>Comments</b>                                                                                                                                                                 | <b>Points</b> |
|----|---------------------------------------------------------------------------------------------------------------------------------------------------------------------------------|---------------|
| 1  | Imaging protocol is documented but NCCT images are not publicly available, due to IRB constrains.                                                                               | 1             |
| 2  | No segmentation or robustness to segmentation variabilities realized                                                                                                            | 0             |
| 3  | Not phantom study realized.                                                                                                                                                     | 0             |
| 4  | No imaging at multiple time point: only pre-therapeutic NCCT were used in our analysis.                                                                                         | 0             |
| 5  | Univariate feature selection of RF performed on the training cohort.                                                                                                            | 3             |
| 6  | No multivariable analysis with non-radiomic features: Only imaging features were used in the current model.                                                                     | 0             |
| 7  | RF selected are related to the literature in the discussion section.                                                                                                            | 1             |
| 8  | Results are reported on the independent validation cohort, along with their 95% confidence interval, to reduce the risk of overfitting and reporting overly optimistic results. | 1             |
| 9  | We report discrimination statistics, notably AUC of ROC curve, along with their 95% confidence interval. We also used cross-validation in the development of the model.         | 1             |
| 10 | Calibration statistics are reported on the training cohort, along with their 95% confidence interval. Resampling method using Nested-CV was used in model development.          | 2             |
| 11 | Our study was not prospectively registered in a trial database.                                                                                                                 | 0             |
| 12 | Validation is based on an independent dataset from the same institute.                                                                                                          | 2             |
| 13 | Our classification is compared to a gold standard, the mTICI score on angiography.                                                                                              | 2             |
| 14 | The clinical utility includes the reduction of time to successful reperfusion, the reduction in number of MTB attempts and the potential reduction of procedural complications. | 2             |
| 15 | Cost-effectiveness analysis was not done in this study.                                                                                                                         | 0             |
| 16 | The RF are defined and publically available via pyradiomics. The model and its weights will be made available upon acceptance of the paper.                                     | 2             |
|    | <b>Total points of this study</b>                                                                                                                                               | <b>17/36</b>  |

**Supplementary Table II:  
TRIPOD Checklist: Prediction Model Development and Validation**

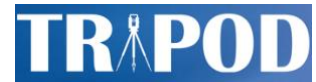

| Section                      |     | Checklist Item |                                                                                                                                                                                                       | Page       |
|------------------------------|-----|----------------|-------------------------------------------------------------------------------------------------------------------------------------------------------------------------------------------------------|------------|
| <b>Title and abstract</b>    |     |                |                                                                                                                                                                                                       |            |
| Title                        | 1   | D;V            | Identify the study as developing and/or validating a multivariable prediction model, the target population, and the outcome to be predicted.                                                          | 1          |
| Abstract                     | 2   | D;V            | Provide a summary of objectives, study design, setting, participants, sample size, predictors, outcome, statistical analysis, results, and conclusions.                                               | 2          |
| <b>Introduction</b>          |     |                |                                                                                                                                                                                                       |            |
| Background and objectives    | 3a  | D;V            | Explain the medical context (including whether diagnostic or prognostic) and rationale for developing or validating the multivariable prediction model, including references to existing models.      | 3          |
|                              | 3b  | D;V            | Specify the objectives, including whether the study describes the development or validation of the model or both.                                                                                     | 4          |
| <b>Methods</b>               |     |                |                                                                                                                                                                                                       |            |
| Source of data               | 4a  | D;V            | Describe the study design or source of data (e.g., randomized trial, cohort, or registry data), separately for the development and validation data sets, if applicable.                               | 5          |
|                              | 4b  | D;V            | Specify the key study dates, including start of accrual; end of accrual; and, if applicable, end of follow-up.                                                                                        | 5          |
| Participants                 | 5a  | D;V            | Specify key elements of the study setting (e.g., primary care, secondary care, general population) including number and location of centres.                                                          | 5          |
|                              | 5b  | D;V            | Describe eligibility criteria for participants.                                                                                                                                                       | 5          |
|                              | 5c  | D;V            | Give details of treatments received, if relevant.                                                                                                                                                     | 5          |
| Outcome                      | 6a  | D;V            | Clearly define the outcome that is predicted by the prediction model, including how and when assessed.                                                                                                | 6-7        |
|                              | 6b  | D;V            | Report any actions to blind assessment of the outcome to be predicted.                                                                                                                                | 5          |
| Predictors                   | 7a  | D;V            | Clearly define all predictors used in developing or validating the multivariable prediction model, including how and when they were measured.                                                         | 6-7        |
|                              | 7b  | D;V            | Report any actions to blind assessment of predictors for the outcome and other predictors.                                                                                                            | 5          |
| Sample size                  | 8   | D;V            | Explain how the study size was arrived at.                                                                                                                                                            | 5          |
| Missing data                 | 9   | D;V            | Describe how missing data were handled (e.g., complete-case analysis, single imputation, multiple imputation) with details of any imputation method.                                                  | 5          |
| Statistical analysis methods | 10a | D              | Describe how predictors were handled in the analyses.                                                                                                                                                 | 6-7        |
|                              | 10b | D              | Specify type of model, all model-building procedures (including any predictor selection), and method for internal validation.                                                                         | 6-7        |
|                              | 10c | V              | For validation, describe how the predictions were calculated.                                                                                                                                         | 7          |
|                              | 10d | D;V            | Specify all measures used to assess model performance and, if relevant, to compare multiple models.                                                                                                   | 7          |
|                              | 10e | V              | Describe any model updating (e.g., recalibration) arising from the validation, if done.                                                                                                               | NA         |
| Risk groups                  | 11  | D;V            | Provide details on how risk groups were created, if done.                                                                                                                                             | NA         |
| Development vs. validation   | 12  | V              | For validation, identify any differences from the development data in setting, eligibility criteria, outcome, and predictors.                                                                         | 5          |
| <b>Results</b>               |     |                |                                                                                                                                                                                                       |            |
| Participants                 | 13a | D;V            | Describe the flow of participants through the study, including the number of participants with and without the outcome and, if applicable, a summary of the follow-up time. A diagram may be helpful. | Fig 1      |
|                              | 13b | D;V            | Describe the characteristics of the participants (basic demographics, clinical features, available predictors), including the number of participants with missing data for predictors and outcome.    | Tab 2      |
|                              | 13c | V              | For validation, show a comparison with the development data of the distribution of important variables (demographics, predictors and outcome).                                                        | NA         |
| Model development            | 14a | D              | Specify the number of participants and outcome events in each analysis.                                                                                                                               | 8-9        |
|                              | 14b | D              | If done, report the unadjusted association between each candidate predictor and outcome.                                                                                                              | Fig 3      |
| Model specification          | 15a | D              | Present the full prediction model to allow predictions for individuals (i.e., all regression coefficients, and model intercept or baseline survival at a given time point).                           | NA         |
|                              | 15b | D              | Explain how to use the prediction model.                                                                                                                                                              | NA         |
| Model performance            | 16  | D;V            | Report performance measures (with CIs) for the prediction model.                                                                                                                                      | 8-9        |
| Model-updating               | 17  | V              | If done, report the results from any model updating (i.e., model specification, model performance).                                                                                                   | NA         |
| <b>Discussion</b>            |     |                |                                                                                                                                                                                                       |            |
| Limitations                  | 18  | D;V            | Discuss any limitations of the study (such as nonrepresentative sample, few events per predictor, missing data).                                                                                      | 11         |
| Interpretation               | 19a | V              | For validation, discuss the results with reference to performance in the development data, and any other validation data.                                                                             | NA         |
|                              | 19b | D;V            | Give an overall interpretation of the results, considering objectives, limitations, results from similar studies, and other relevant evidence.                                                        | 9-11       |
| Implications                 | 20  | D;V            | Discuss the potential clinical use of the model and implications for future research.                                                                                                                 | 11         |
| <b>Other information</b>     |     |                |                                                                                                                                                                                                       |            |
| Supplementary information    | 21  | D;V            | Provide information about the availability of supplementary resources, such as study protocol, Web calculator, and data sets.                                                                         | S.Tab 1, 2 |
| Funding                      | 22  | D;V            | Give the source of funding and the role of the funders for the present study.                                                                                                                         | 12         |

Items relevant only to the development of a prediction model are denoted by D, items relating solely to a validation of a prediction model are denoted by V, and items relating to both are denoted D;V.
